# Supplementary material
Source: PubMed Central journal article supplement (PMC3146726)
Supplement: mmc1.pdf [file mmc1.pdf]

## **Supplemental Data**

**American Journal of Human Genetics, Volume 88**

### **Kufs Disease, the Major Adult Form of Neuronal Ceroid**

### **Lipofuscinosis, Caused by Mutations in *CLN6***

Todor Arsov, Katherine R. Smith, John Damiano, Silvana Franceschetti, Laura Canafoglia, Catherine J. Bromhead, Eva Andermann, Danya F. Vears, Patrick Cossette, Sulekha Rajagopalan, Alan McDougall, Vito Sofia, Michael Farrell, Umberto Aguglia, Andrea Zini, Stefano Meletti, Michela Morbin, Saul Mullen, Frederick Andermann, Sara E. Mole, Melanie Bahlo, and Samuel F. Berkovic

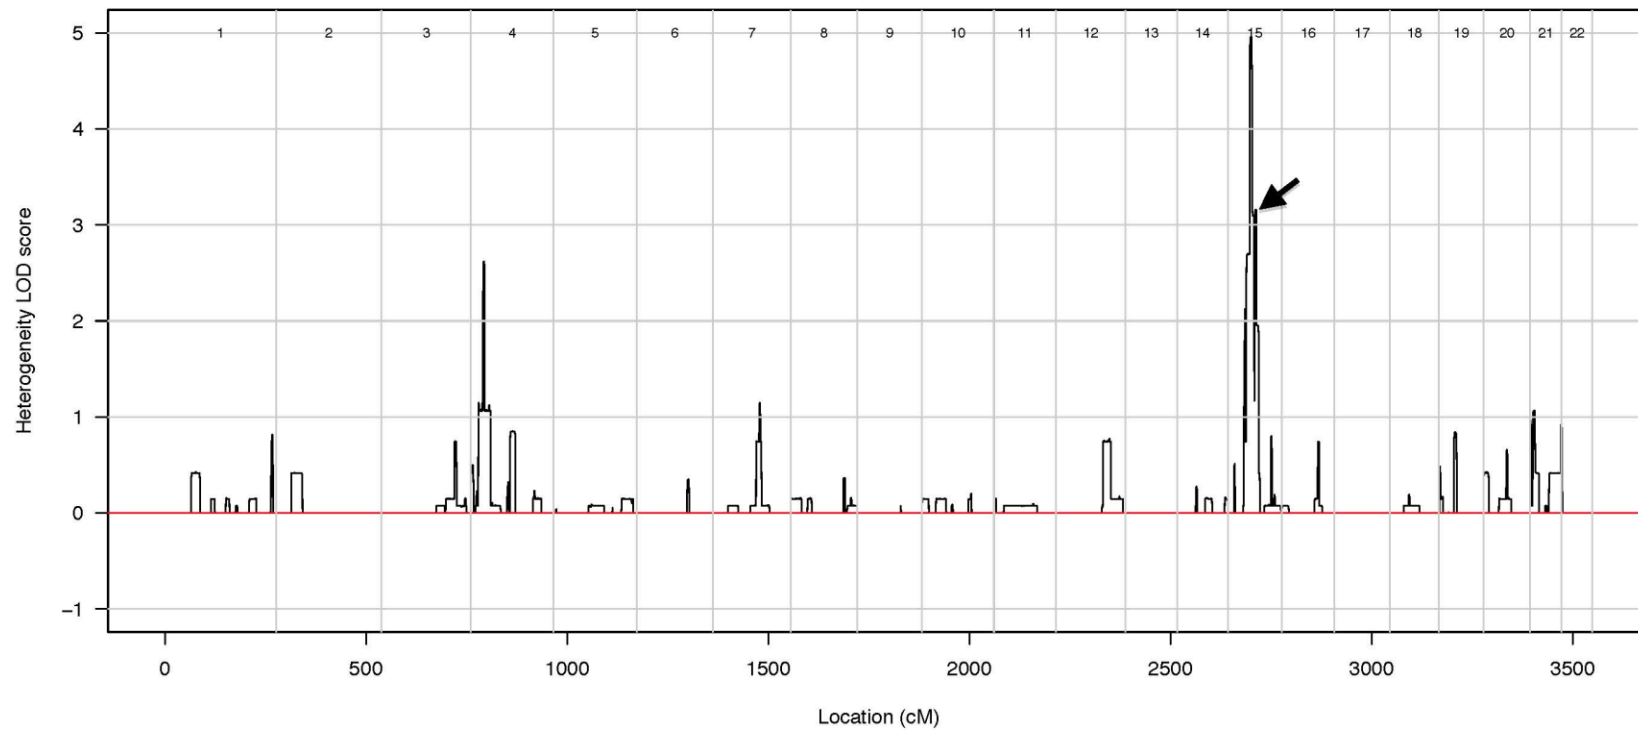

**Figure S1. Results of Genome-Wide Linkage Mapping Using Ku1, Ku2, Ku3 and Ku4**

Genome wide heterogeneity LOD score for the families used in the linkage analysis. Grey vertical lines delineate chromosomes. The x axis is in cM. The arrow indicates the shoulder peak on chromosome 15 that contains *CLN6*.

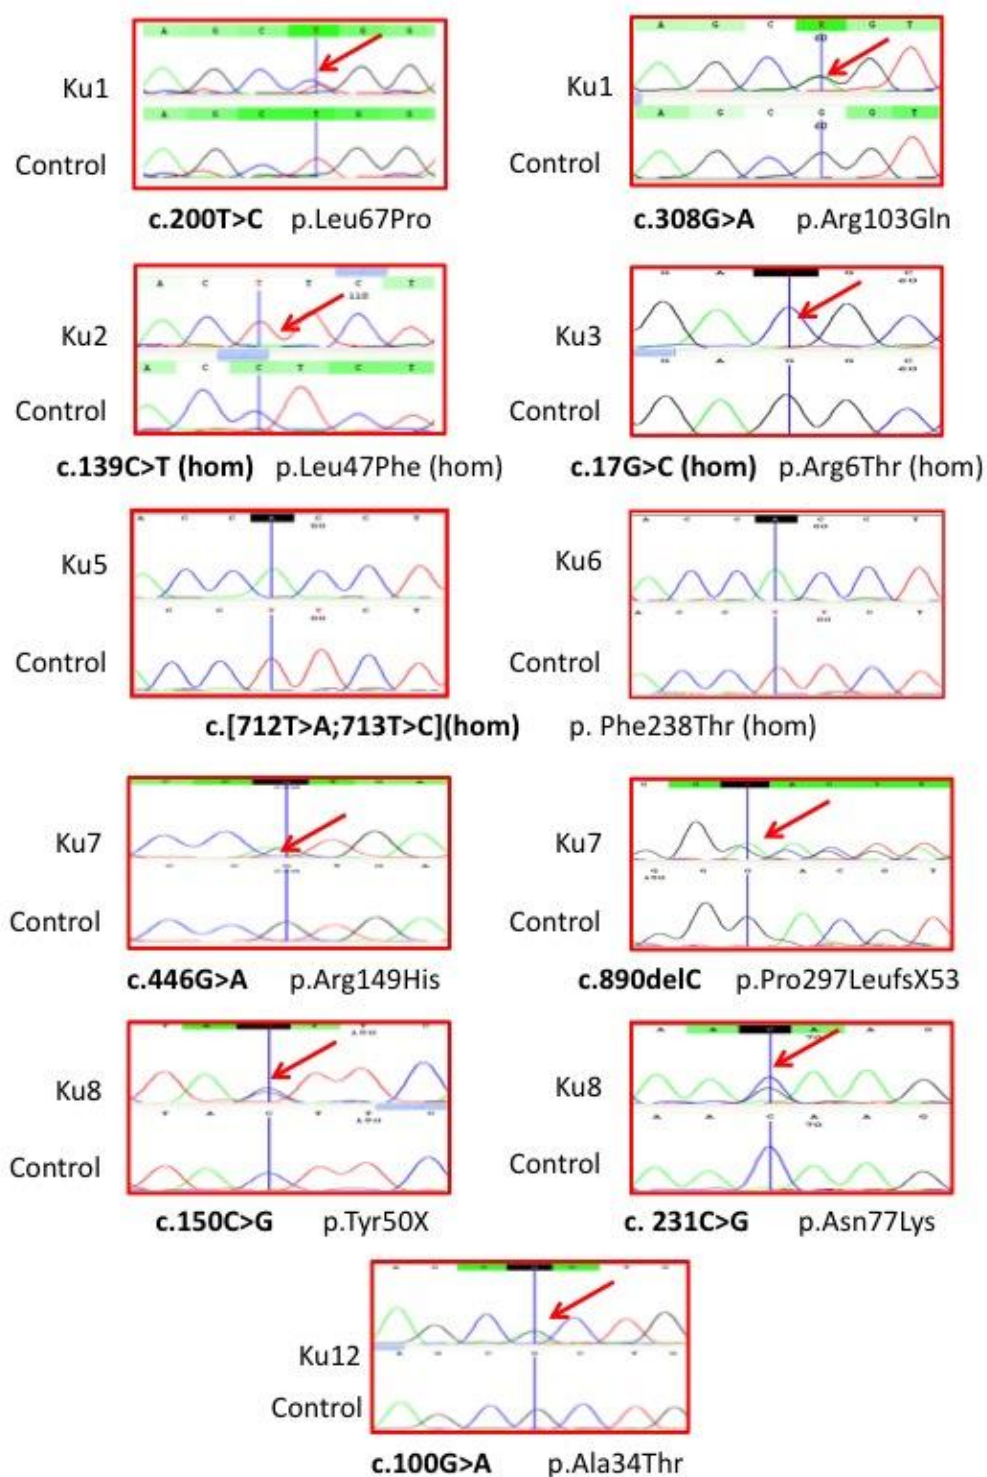

**Figure S2.** Sequence Traces of Nine Mutations in *CLN6* Detected in Seven Families  
 Note that Ku5 and Ku6 share a common homozygous mutation, p.Phe238Thr. Additionally a variant in Ku12; likely a non-pathogenic rare variant is shown.

**Table S1.** Evolutionary Conservation of 9 Mutated Amino Acids in CLN6 in 7 Families and One Probable Nonpathogenic Variant (Ku12)

| Family <sup>a</sup>                    | Ku1          |           | Ku2          | Ku3         | Ku5<br>Ku6    | Ku7           |              | Ku8        |          | Ku12                  |
|----------------------------------------|--------------|-----------|--------------|-------------|---------------|---------------|--------------|------------|----------|-----------------------|
| Mutation                               | Leu67<br>Pro | Arg103Glu | Leu47<br>Phe | Arg6<br>Thr | Phe238<br>Thr | Arg149<br>His | Pro297LeufsX | Tyr50X     | Asn77Lys | Ala34Thr <sup>b</sup> |
| Human                                  | Leu          | Arg       | Leu          | Arg         | Phe           | Arg           | Pro          | Tyr        | Asn      | Ala                   |
| Rhesus                                 | Leu          | Arg       | Leu          | -           | Phe           | Arg           | Pro          | Tyr        | Asn      | Ala                   |
| Mouse                                  | Leu          | Arg       | Leu          | Arg         | Phe           | Arg           | Pro          | Tyr        | Asn      | Ala                   |
| Dog                                    | Leu          | Arg       | Leu          | Arg         | Phe           | Arg           | Pro          | Tyr        | Asn      | Ala                   |
| Elephant                               | -            | -         | Leu          | Arg         | Phe           | Arg           | Pro          | Tyr        | Asn      | Ala                   |
| Opossum                                | Ile          | Arg       | Leu          | -           | Tyr           | Arg           | Pro          | Tyr        | Asn      | Ala                   |
| Chicken                                | Ile          | Arg       | Leu          | -           | Phe           | Arg           | Pro          | Tyr        | Asn      | Asp                   |
| Xenopus                                | Ile          | Arg       | Leu          | -           | Phe           | Arg           | Pro          | Tyr        | Asn      | Pro                   |
| Stickleback                            | Ile          | Arg       | Leu          | -           | Phe           | Arg           | Pro          | Cys        | Asn      | Pro                   |
| PolyPhen-2<br>probability <sup>c</sup> | 0.82         | 0.63      | 0.95         | 0.83        | 0.014         | 0.81          | Frameshift   | Truncation | 0.89     | 0.75                  |

<sup>a</sup> Sanger sequencing of *CLN6* did not detect any mutations for families Ku4, Ku9, Ku10 and Ku11.

<sup>b</sup> Evolutionary conservation of exon 1 was assessed on the nucleotide level.

<sup>c</sup> PolyPhen-2 classifier probability of the variation being damaging; benign - probability  $\leq 0.18$ , possibly damaging - probability between 0.63 and 0.83 and probably damaging- probability  $\geq 0.89$  (Ref 29).
